# Supplementary material
Source: HighWire-hosted journal article supplement (https://drc.bmj.com/content/7/1/e000658)
Supplement: inline-supplementary-material-1 [file inline-supplementary-material-1.docx]

**المقياس العراقي للالتزام بأدوية السكري**

لقد قام فريق البحث بتطوير هذه الاستبانة (المقياس) بهدف استخدامها لتقييم مدى التزام مرضى السكري باستخدام الادوية المعالجة للسكري. وللتأكد من صلاحية وموثوقية هذا المقياس نحن بحاجة الى تجربته على عدد من مرضى السكري من النوع الثاني. اذا كنت موافقا على المشاركة في هذا البحث يرجى منك ملئ هذه الاستبانة ولك جزيل الشكر.

**ملاحظة:** يمكن الانسحاب من البحث وعدم اكمال ملئ الاستبانة عند الرغبة بذلك. علما ان هذا التصرف مقبول ولايترتب عليه اي تبعات سلبية.

**الجزء الاول: يرجى الاجابة عن هذه الاسئلة الخاصة بك وبمرضك (السكري)**

**العمر: ______**سنة

**الجنس:** 🌕 ذكر 🌕 انثى

**منذ متى وانت مصاب بالسكري:** ________سنة

**حدد تحصيلك الدراسي**

🌕 بدون اي تحصيل دراسي

🌕 ابتدائية

🌕 ثانوية

🌕 معهد

🌕 كلية

🌕 دراسات عليا

**أذكر الادوية التي تستخدمها لعلاج مرض السكري:**

1. **__________________________**
2. **__________________________**
3. **__________________________**

**منذ متى بدأت باستخدام هذه الادوية؟ ___________** شهر/سنة

**الجزء الثاني: حاول تذكر كيف قمت باخذ الادوية الخاصة بالسكري ثم أجب على الاسئلة التالية:**

1. **خلال الشهر الماضي كم مرة نسيت ان تاخذ ادويتك ؟**
2. دائما
3. في اغلب الاحيان
4. في بعض الاحيان
5. نادرا
6. ابدا
7. **خلال الشهر الماضي, كم مرة تعمدت اخذ ادويتك بجرع تختلف عما هو موصوف لك ؟**
8. دائما
9. في اغلب الاحيان
10. في بعض الاحيان
11. نادرا
12. ابدا
13. **خلال الشهر الماضي, كم مرة تعمدت اخذ ادويتك بوقت يختلف عماهو موصوف لك؟**
14. دائما
15. في اغلب الاحيان
16. في بعض الاحيان
17. نادرا
18. ابدا
19. **خلال الشهر الماضي, هل كنت تصطحب ادويتك معك عند مغادرتك المنزل (مثلا عند السفر او الخروج لزيارة الاقارب) ؟**
20. نعم
21. لا
22. **خلال الشهر الماضي, هل توقفت عن استخدام ادويتك دون استشارة طبية بسبب الاعراض الجانبية للدواء؟**
23. نعم
24. لا
25. **خلال الشهر الماضي, هل قمت باخذ كمية اقل من ادويتك دون استشارة طبية بسبب شعورك بالتحسن؟**
26. نعم
27. لا
28. **في الايام التي تكون مريضا فيها (مثلا في حالة الانفلونزا او الاسهال) هل تقوم باخذ كمية اقل من ادويتك دون استشارة طبية بسبب قلة شهيتك للطعام؟**
29. نعم
30. لا
31. **خلال الشهر الماضي, هل قمت باخذ كمية اقل من ادويتك بسبب غلائها؟**
32. نعم
33. لا

**The Iraqi anti-diabetic medication adherence scale (IADMAS)**

A group of researchers developed this questionnaire (scale) to be used for assessing the adherence to the anti-diabetic medications.

To assess validity and reliability of the developed scale, we are in need to test it in type 2 diabetic patients. If you accept participation in this research, please fill in the following questionnaire.

**Note:** Withdrawn from participation in this study is permissible at any time without any consequences.

**Part 1: Please answer the following questions about yourself and your diabetes:**

**Age:** ________ years

**Gender:** 🌕Male 🌕female

**Since how long you have diabetes:** _______ years

**Indicate your educational level:**

🌕No formal education

🌕Primary

🌕Secondary

🌕Diploma

🌕College

🌕Postgraduate

**Mention your current anti-diabetic medications:**

1. __________________________

2. __________________________

3. ___________________________

**Since how long you have been using the current anti-diabetic medications?**

____________ months/years

**Part2: Try to remember how do you take your anti-diabetic medications and then answer the following questions:**

1. **In the last month, how often did you forget to take your medication(s)?**
2. Always
3. Often
4. Sometimes
5. Rarely
6. Never
7. **In the last month, how often did you intend to take your medication(s) in doses different to what has been prescribed?**
8. Always
9. Often
10. Sometimes
11. Rarely
12. Never
13. **In the last month, how often did you intend to take your medication(s) in a time different to what has been prescribed?**
14. Always
15. Often
16. Sometimes
17. Rarely
18. Never
19. **In the last month, did you take your medication(s) with you when you are away from home (e.g., traveling or visiting relatives)?**
20. Yes
21. No
22. **In the last month, did you stop taking your medication(s) without consulting a physician because of medication side effects?**
23. Yes
24. No
25. **In the last month, did you take less of your medication(s) without consulting a physician because you feel better?**
26. Yes
27. No
28. **During sick days (e.g., flu, diarrhea, etc.), did you take less of your medication(s) without consulting a physician due to reduced appetite?**
29. Yes
30. No
31. **In the last month, did you take less of your medication(s) without consulting a physician because of a high medication cost?**
32. Yes
33. No
